1           **Tolerance-conferring defensive symbionts and the**  
2                                   **evolution of parasite virulence**

3                                   Cameron A. Smith<sup>1</sup> and Ben Ashby<sup>1,2,3</sup>

4    1. Department of Mathematical Sciences, University of Bath.

5    2. Milner Centre for Evolution, University of Bath.

6    3. Department of Mathematics, Simon Fraser University.

7

8    **Keywords:** defensive symbiosis, mutualism, parasitism, biocontrol, coevolution, tolerance

9 **ABSTRACT**

10 Defensive symbionts in the host microbiome can confer protection from infection or reduce the  
11 harms of being infected by a parasite. Defensive symbionts are therefore promising agents of  
12 biocontrol that could be used to control or ameliorate the impact of infectious diseases. Previous  
13 theory has shown how symbionts can evolve along the parasitism-mutualism continuum to confer  
14 greater or lesser protection to their hosts, and in turn how hosts may coevolve with their symbionts  
15 to potentially form a mutualistic relationship. However, the consequences of introducing a defensive  
16 symbiont for parasite evolution and how the symbiont may coevolve with the parasite have yet to  
17 be explored theoretically. Here, we investigate the ecological and evolutionary implications of  
18 introducing a tolerance-conferring defensive symbiont into an established host-parasite system. We  
19 show that while the defensive symbiont may initially have a positive impact on the host population,  
20 parasite and symbiont evolution tend to have a net negative effect on the host population in the  
21 long-term. This is because the introduction of the defensive symbiont always selects for an increase  
22 in parasite virulence and may cause diversification into high- and low-virulence strains. Even if the  
23 symbiont experiences selection for greater host protection, this simply increases selection for  
24 virulence in the parasite, resulting in a net negative effect on the host population. Our results  
25 therefore suggest that tolerance-conferring defensive symbionts may be poor biocontrol agents for  
26 population-level infectious disease control.

## 27 **IMPACT SUMMARY**

28 Defensive symbionts – microbes that confer protection to a host against a harmful parasite – are  
29 found throughout the natural world and represent promising candidates for biological control to  
30 combat infectious diseases. Symbionts can protect their hosts through a variety of mechanisms that  
31 may prevent infection (resistance) or mitigate disease (tolerance), yet our understanding of the  
32 ecological and evolutionary impact of defensive symbionts on parasites is limited. Moreover, few  
33 theoretical predictions exist for how defensive symbionts are likely to evolve in the presence of  
34 parasites, and for the net effect on the host population. Using a mathematical model where  
35 defensive symbionts reduce parasite virulence (harm to the host), we investigate the impact of their  
36 introduction on the evolution of parasite virulence, how selection increases or decreases host  
37 protection, and whether such symbionts are beneficial for the host population. We find that this  
38 form of defensive symbiosis always selects for higher parasite virulence and that it can cause the  
39 parasite to diversify into high and low virulence strains which specialise on different host  
40 subpopulations. Crucially, we show that the introduction of a defensive symbiont will always lead to  
41 a long-term reduction in host population size even if they are beneficial in the short-term. Together,  
42 our results show that defensive symbionts can have a strong impact on the evolution of virulence  
43 and that this form of host protection is not robust, indicating that tolerance-conferring symbionts  
44 are likely to be poor candidates for biological control of infectious diseases at the population level.

## 45 INTRODUCTION

46 Defensive symbiosis, where an organism confers protection to its host from a natural enemy such as  
47 a parasite or predator is widespread in nature (reviewed in (Ford and King 2016)). For example, ants  
48 have long been known to defend acacia trees from herbivores (Belt, Thomas 1874) and various  
49 bacteria have been shown to confer protection directly or indirectly against bacterial and fungal  
50 parasites across diverse host taxa, including insects (Oliver et al. 2003; Cariveau et al. 2014), plants  
51 (Herre et al. 2007; Arnold et al. 2003), invertebrates (Gil-Turnes, Hay, and Fenical 1989; Gil-Turnes  
52 and Fenical 1992), and vertebrates (Lauer and Hernandez 2015; Heikkilä and Saris 2003). Protection  
53 can be conferred to hosts through a variety of mechanisms (Troha and Ayres 2022), including  
54 through interactions with the host's immune system (Ford, Drew, and King 2022), interference  
55 competition through chemical defences - for example, *Streptococcus pneumoniae* can produce  
56 hydrogen peroxide to displace *Staphylococcus aureus* in the nasopharynx (Selva et al. 2009) – and  
57 resource competition or priority effects (Hancock, Sinkins, and Godfray 2011; Moreira et al. 2009).  
58 Defensive symbionts therefore have potential as agents of biocontrol, especially in the context of  
59 infectious diseases for therapeutic use (Bakken et al. 2011) or for population-level control (Utarini et  
60 al. 2021). The use of defensive symbionts should be approached with caution, however, as the  
61 nature and extent of protection conferred to their hosts is evolvable and they could alter both the  
62 ecological and evolutionary dynamics of hosts and parasites, potentially leading to unintended  
63 consequences which have yet to be thoroughly explored.

64

65 Crucially, the protective relationship between a defensive symbiont and its host is not fixed; it may  
66 be context dependent, due to changes in the biotic or abiotic environment (González et al. 2021;  
67 King et al. 2016; Ashby and King 2017; Rafaluk-Mohr et al. 2018; Rogalski et al. 2021; Chamberlain,  
68 Bronstein, and Rudgers 2014; Lin and Koskella 2015), and it is subject to selection (King et al. 2016;  
69 Rafaluk-Mohr et al. 2022). For example, the removal of large herbivores can lead to the loss of acacia

70 tree protection by ants (Palmer et al. 2008) and protective microbes such as *Enterococcus faecalis*  
71 reduce nematode fitness in the absence of *Staphylococcus aureus* but can be experimentally evolved  
72 to rapidly increase protection of their hosts when *S. aureus* is present (King et al. 2016). An organism  
73 may therefore be parasitic to its host in isolation, but may be protective – and may evolve to be  
74 more or less protective – when another parasite is present (Ashby and King 2017; Rafaluk-Mohr et  
75 al. 2018). Understanding evolution along the parasitism-mutualism continuum is therefore a key  
76 challenge for evolutionary biologists, especially in the context of the gut microbiome and infectious  
77 diseases. In particular, understanding the evolutionary robustness of host protection is particularly  
78 important when defensive symbionts are used as biocontrol agents, as their effectiveness will  
79 depend on both on the initial impact on the parasite, as well as the subsequent coevolutionary  
80 dynamics between host protection and parasite virulence.

81

82 Theoretical studies of host-associated communities have primarily focused on the effects of within-  
83 and between-host competition on the evolution of virulence (reviewed in (Alizon 2013)). By  
84 comparison, few theoretical studies have explored microbial evolution in the context of defensive  
85 symbiosis. Ashby and King (2017) explore how host protection evolves in the presence of a non-  
86 evolving parasite population, showing that conferred tolerance and resistance could readily evolve  
87 under a wide range of conditions, potentially leading to symbiont diversification into a highly  
88 protective strain and one that conferred no protection. This model was extended by Rafaluk-Mohr et  
89 al. (2018) to explore symbiont coevolution with the host, showing that the host becomes more  
90 mutualistic towards the symbiont at intermediate levels of protection. Nelson and May (2017)  
91 investigate the evolution of symbionts along the full mutualism-parasitism continuum when there is  
92 a shared cost of virulence. They show that the community of symbionts maintain mutualisms and  
93 evolve lower virulence when the shared costs are sufficiently low, but higher virulence may evolve  
94 when shared costs are high. Nelson and May (2020) extend this model to show that if increased

95 defence is evolved by one symbiont, it may facilitate the reduction of virulence in both symbionts  
96 present, and in some cases cause pathogens to evolve towards mutualism. Together, these studies  
97 highlight the complex context-dependent nature of coevolution between mutualistic and parasitic  
98 symbionts.

99

100 Here, we use a mathematical model to explore the (co)evolution of parasite virulence and host  
101 protection – specifically, tolerance – by a defensive symbiont. We first show how the introduction of  
102 a defensive symbiont always selects for greater parasite virulence, and that the defensive symbiont  
103 can induce the parasite to diversify into high and low virulent strains. We then show how the shape  
104 of life-history trade-offs associated with host protection affect the outcome of symbiont-parasite  
105 coevolution, and that this always results in a reduction in the host population size in the long term.

106

## 107 **MATERIALS AND METHODS**

### 108 ***MODEL***

109 We consider a well-mixed population of hosts with two co-circulating microbes: an obligate parasite  
110 that increases host mortality and a defensive symbiont that may confer tolerance to infected hosts  
111 by reducing disease-associated mortality. Hosts may exist in one of four states, where they harbour:  
112 no microbes ( $H$ ), defensive symbionts only ( $D$ ), parasitic microbes only ( $P$ ) or both ( $B$ ). New hosts  
113 are born at rate  $v(N) = N(a - qN)$ , where  $N = H + D + P + B$  is the total number of hosts,  $a$  is  
114 the maximum per capita rate of reproduction and  $q$  controls the strength of density dependent  
115 competition. All hosts, regardless of infection status, have a natural mortality rate  $b$ .

116

117 We assume that transmission is density-dependent, occurring at a baseline rate of  $\bar{\beta}_D$  for the  
118 defensive microbe with a clearance rate of  $\gamma_D$ , and  $\beta_P$  for the parasite with a clearance rate of  $\gamma_P$ .

119 There is no vertical transmission (all individuals begin life without either microbe), co-transmission  
 120 does not occur (i.e., hosts must transition through one of the single-microbe classes to reach class  
 121  $B$ ), and there is no long-lasting immunity. Both defensive and parasitic microbes increase the  
 122 baseline mortality rate of the host, by  $\alpha_D$  and  $\bar{\alpha}_P$ , respectively. We assume that the parasite  
 123 experiences a power-law trade-off between transmission and virulence such that  $\alpha_P(\beta_P) =$   
 124  $\bar{\alpha}_P(1 + \beta_P^d)$  with  $d > 1$  so that there are diminishing returns for increased virulence. Defensive  
 125 microbes may confer protection to parasitised hosts in the form of tolerance,  $y \in [0,1]$ , such that  
 126 the additional mortality rate for hosts with both microbes,  $\alpha_B(y, \beta_P)$ , satisfies  $\alpha_B(y, \beta_P) \leq$   
 127  $\alpha_P(\beta_P) + \alpha_D$  (i.e. it is less than or equal to the sum of the additional mortality rates). However, the  
 128 defensive microbe incurs a fitness cost when it diverts resources to protect a host, resulting in a  
 129 reduction in transmissibility such that  $\beta_D(y) = \bar{\beta}_D(1 - c(y))$ , where  $c(y)$  is an increasing, non-  
 130 linear cost function:

$$c(y) = \begin{cases} \frac{c_1(1 - e^{c_2 y})}{1 - e^{c_2}}, & c_2 \neq 0, \\ c_1 y, & c_2 = 0 \end{cases} \quad (1)$$

131  
 132 where  $c_1 \in [0,1]$  is the strength of the cost function, denoting the maximum reduction in  
 133 transmission when tolerance, and  $c_2$  controls the shape of the trade-off: when  $c_2 > 0$ , conferring  
 134 protection is increasingly costly (an accelerating trade-off), and when  $c_2 < 0$  conferring protection is  
 135 decreasingly costly (a decelerating trade-off).

136

137 The ecological dynamics of monomorphic populations are shown schematically in Fig. 1 and are  
 138 governed by the following ordinary differential equations (ODEs)

$$\frac{dH}{dt} = v(N) - [b + \beta_D(y)(D + B) + \beta_P(P + B)]H + \gamma_D D + \gamma_P P, \quad (2)$$

|   |     |
|---|-----|
| — | (3) |
| — | (4) |
| — | (5) |

139

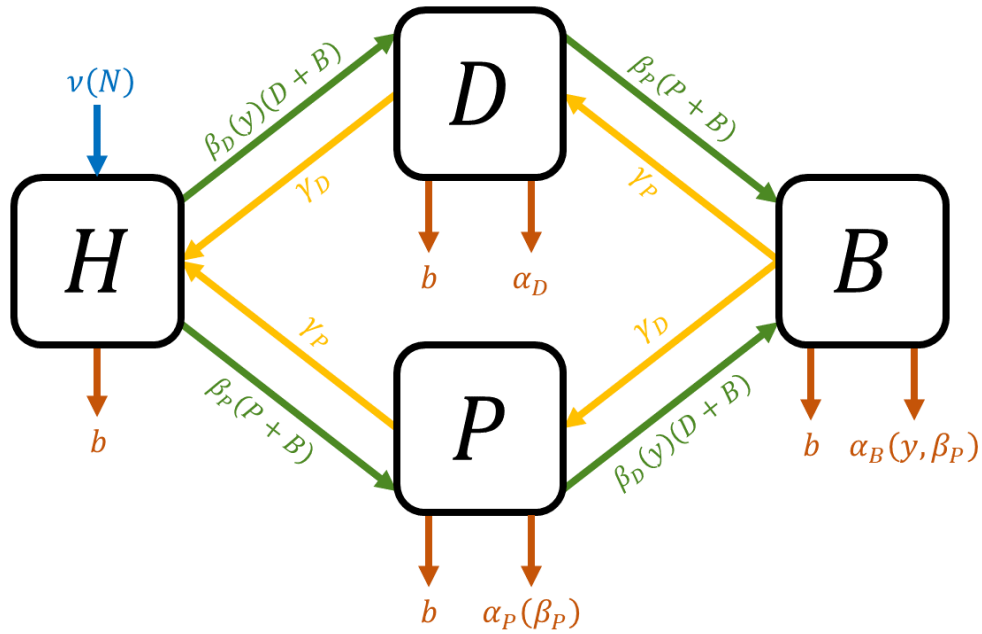

140

141

142 *Fig. 1: Model schematic. Arrows denote transitions into or out of states at the indicated rates:*

143 *transmission (green), mortality (red), recovery/clearance (yellow) and birth of new hosts (blue).*



144 **ANALYSIS**

145 We employ evolutionary invasion analysis using a combination of numerical analysis and simulations  
 146 to establish how parasite virulence ( $\alpha_P$ ) evolves following the introduction of the defensive  
 147 symbiont, and in turn how the defensive symbiont co-evolves to be more or less protective ( $y$ )  
 148 following its introduction.

149

150 We use the next generation method (Diekmann, Heesterbeek, and Roberts 2010) (see  
 151 *Supplementary Material*) to derive the invasion fitness for a rare defensive symbiont with protection  
 152  $y^m$ , or a rare parasite with transmission rate  $\beta_P^m$  and virulence  $\alpha_P^m$ , when introduced into a  
 153 population at equilibrium with resident traits  $\theta^r = (y^r, \beta_P^r)$ :

|                                                                                                                                                                                                                                                                                                                                                                              |     |
|------------------------------------------------------------------------------------------------------------------------------------------------------------------------------------------------------------------------------------------------------------------------------------------------------------------------------------------------------------------------------|-----|
| $w_D(y^m   \theta^r) = \frac{\beta_D(y^m) \{H^* [b + \gamma_D + \gamma_P + \alpha_B(y^m, \beta_P^r) + \beta_P^r(P^* + B^*)] + P^* [b + \gamma_D + \gamma_P + \alpha_D + \beta_P^r(P^* + B^*)]\}}{(b + \gamma_D + \alpha_D + \beta_P^r(P^* + B^*))(b + \alpha_B(y^m, \beta_P^r) + \gamma_D + \gamma_P) - \gamma_P \beta_P^r(P^* + B^*)}$                                      | (6) |
| $w_P(\beta_P^m   \theta^r) = \frac{\beta_P^m \{H^* [b + \gamma_D + \gamma_P + \alpha_B(y^r, \beta_P^m) + \beta_D(y^r)(D^* + B^*)] + D^* [b + \gamma_D + \gamma_P + \alpha_P(\beta_P^m) + \beta_D(y^r)(D^* + B^*)]\}}{(b + \gamma_P + \alpha_P(\beta_P^m) + \beta_D(y^r)(D^* + B^*))(b + \alpha_B(y^r, \beta_P^m) + \gamma_D + \gamma_P) - \gamma_D \beta_D(y^r)(D^* + B^*)}$ | (7) |

154

155 where each of the steady states (indicated with asterisks) are functions of the resident traits, for  
 156 example  $H^* \equiv H^*(\theta^r)$ . We are unable to obtain an analytical expression for these steady states, so  
 157 we approximate them in our numerical analysis by simulating the ODE system for a sufficiently long  
 158 period of time so that the population approaches its unique, locally asymptotically stable, endemic  
 159 equilibrium. We derive the respective fitness gradients,  $\mathcal{F}_D(y) = \frac{\partial w_D}{\partial y^m} \Big|_{y^m=y}$  and  $\mathcal{F}_P(\beta_P) =$

160  $\frac{\partial w_P}{\partial \beta_P^m} \Big|_{\beta_P^m=\beta_P}$ , from equations (6)-(7) (omitted for brevity) and find singular strategies,  $y^*$  and  $\beta_P^*$ , by

161 numerically solving  $\mathcal{F}_D(y^*) = 0$  and  $\mathcal{F}_P(\beta_P^*) = 0$ . Singular strategies are evolutionarily stable if

162  $\mathcal{E}_D(y^*) = \frac{\partial^2 w_D}{\partial (y^m)^2} \Big|_{y^m=y=y^*} < 0$  and  $\mathcal{E}_P(\beta_P^*) = \frac{\partial^2 w_P}{\partial (\beta_P^m)^2} \Big|_{\beta_P^m=\beta_P=\beta_P^*} < 0$ , respectively. For parasite

163 evolution only, we determine convergence stability by numerically evaluating the derivative

164  $C_P(\beta_P^*) = \left. \frac{\partial^2 w_P}{\partial \beta_P^m \partial \beta_P} \right|_{\beta_P^m = \beta_P = \beta_P^*}$  and checking that  $\mathcal{E}_P(\beta_P^*) < C_P(\beta_P^*)$ . In the case of coevolution, we

165 assume equal mutation rates for defensive symbionts and parasites, and determine strong

166 convergence stability using the method presented in (Leimer 2009) (see *Supplementary Material*).

167

168 We assume that the defensive symbiont is introduced into a well-established host-parasite system,

169 with the parasite at its unique continuously stable strategy (CSS) in the absence of the defensive

170 symbiont (see *Supplementary Material*), which is given by

$$\tilde{\beta}_P^* = \left( \frac{b + \gamma_P + \tilde{\alpha}_P}{(d-1)\tilde{\alpha}_P} \right)^{\frac{1}{d}}. \quad (8)$$

171

172 In addition to exploring the effects of the defensive symbiont on the (co)evolution of virulence and

173 host protection, we measure the net effect on the host population size and change in the average

174 host mortality rate (relative to the initial symbiont-free population). The net effect on the host

175 population size is measured by comparing the steady state in the presence and absence of the

176 defensive symbiont,  $N^*(y, \beta_P)$  and  $\tilde{N}^*$  respectively. Similarly, we calculate the average disease-

177 associated mortality rate at equilibrium in the presence and absence of the defensive symbiont,

178  $r^*(y, \beta_P)$  and  $\tilde{r}^*$ , respectively as:

$$r^*(y, \beta_P) = \alpha_D \frac{D^*(y, \beta_P)}{N^*(y, \beta_P)} + \alpha_P(\beta_P) \frac{P^*(y, \beta_P)}{N^*(y, \beta_P)} + \alpha_C(y, \beta_P) \frac{B^*(y, \beta_P)}{N^*(y, \beta_P)}, \quad (9)$$

$$\tilde{r}^* = \tilde{\alpha}_P \frac{\tilde{P}^*}{\tilde{N}^*}, \quad (10)$$

179 where we have explicitly written the dependence of the trait variables on the steady state values.

180 We then define the following two measures to determine the net effects on the host population

181 following the introduction of the defensive symbiont:

$$Q_1(y, \beta_p) = 100 \left( \frac{N^*(y, \beta_p)}{\tilde{N}^*} - 1 \right), \quad (11)$$

$$Q_2(y, \beta_p) = 100 \left( 1 - \frac{r^*(y, \beta_p)}{\tilde{r}^*} \right). \quad (12)$$

182

183 The first measure (equation 11) is the percentage increase in the host population size and the  
184 second measure (equation 12) is the percentage decrease in the disease-associated mortality rate.

185

## 186 ***SIMULATIONS***

187 The above analysis makes two key assumptions: (1) that there is a separation of the ecological and  
188 evolutionary time scales (i.e. mutations are rare), and (2) that selection is weak, so that mutations  
189 only have a small phenotypic effect (i.e. traits are continuous). We relax these assumptions in our  
190 simulations by allowing new mutants to arise before the ecological dynamics are close to their  
191 ecological attractor and by discretising the trait space so that new mutations have small but finite  
192 effects. Simulations proceed as follows (described for the coevolution case). We initialise a resident  
193 population which has a defensive symbiont protection level of  $y^r$  and a parasite transmission of  $\tilde{\beta}_p^*$   
194 as defined in equation (8). We simulate the ecological dynamics (1)-(4) for a total (arbitrary) time of  
195  $T_{eco} = 100$ . We choose either the defensive symbiont or parasite population with equal probability  
196 and introduce a mutant at low frequency with trait value differing from the resident by a small  
197 amount,  $\epsilon_D$  or  $\epsilon_P$ . We then run the ecological dynamics again for another  $T_{eco}$  time units, remove  
198 any phenotypes that have dropped below a frequency of  $\epsilon = 10^{-4}$  (this threshold is arbitrary) and  
199 then introduce a new mutant again, by firstly choosing the defensive symbiont or parasite with  
200 equal probability and then choosing a trait to mutate proportional to its frequency. This continues  
201 for a total of  $T_{evo}$  evolutionary time-steps.

202

| Parameter        | Description                                                    | Default value |
|------------------|----------------------------------------------------------------|---------------|
| $a$              | Maximum per-capita host birth rate                             | 1.0           |
| $b$              | Host natural mortality rate                                    | 0.25          |
| $c_1$            | Defensive symbiont cost strength parameter                     | 0.25          |
| $c_2$            | Defensive symbiont cost shape parameter                        | 2             |
| $d$              | Power-law for parasite virulence cost                          | 2             |
| $q$              | Strength of density-dependent competition on host reproduction | 0.25          |
| $T_{eco}$        | Duration for ecological time steps                             | 100           |
| $T_{evo}$        | Duration for evolutionary simulations                          | 2000          |
| $\alpha_D$       | Cost of harbouring the defensive symbiont                      | 0.1           |
| $\bar{\alpha}_P$ | Virulence parameter for parasite                               | 0.1           |
| $\bar{\beta}_D$  | Maximum transmission rate for defensive symbiont               | 2             |
| $\gamma_D$       | Host recovery rate for defensive symbiont                      | 0.05          |
| $\gamma_P$       | Host recovery rate for parasite                                | 0.05          |
| $\varepsilon$    | Extinction threshold                                           | $10^{-4}$     |

203 *Table 1: Default parameter values for the model (1)-(4).*

204 **RESULTS**

205 We begin by exploring how the introduction of a (non-evolving) defensive symbiont affects the  
206 quantitative and qualitative evolution of parasite virulence, before considering coevolution of both  
207 microbes.

208

209 ***DEFENSIVE SYMBIONTS THAT CONFER TOLERANCE ALWAYS SELECT FOR INCREASED***

210 ***VIRULENCE***

211 The introduction of a non-evolving defensive symbiont, which confers a fixed level of tolerance to  
212 parasitised hosts, always leads to selection for higher parasite virulence (Fig. 2a). This is because the  
213 defensive symbiont not only directly reduces virulence when present with the parasite (hence,  
214 reducing the cost to the parasite of elevated virulence), but also competes with the parasite for  
215 hosts (thus increasing selection for a higher transmission rate, and hence higher virulence). The  
216 latter effect is more subtle and is typically weaker but is evident when the defensive symbiont  
217 confers no protection to the host ( $y = 0$ ), as the parasite still evolves increased virulence due to  
218 increased competition for hosts. The strength of the first effect depends on both the level ( $y$ ) and  
219 cost ( $c_1$ ) of conferred protection, which together determine how often the parasite shares a host  
220 with a symbiont (Fig. 2c). When the cost to the defensive symbiont of conferring tolerance ( $c_1$ ) is  
221 sufficiently low, greater host protection ( $y$ ) always selects for higher parasite virulence because the  
222 parasite frequently shares hosts with the defensive symbiont, and so benefits from decreased  
223 realised virulence due to tolerance conferred to the host by the symbiont. However, when the cost  
224 of host protection is relatively high, fewer hosts harbour the defensive symbiont and so the parasite  
225 is less likely to benefit from conferred tolerance, resulting in evolved virulence peaking at an  
226 intermediate level of host protection (Fig. 2a).

227

228 As the defensive symbiont confers tolerance to the host, higher evolved virulence does not  
229 necessarily imply that realised virulence will be higher. Yet, following the introduction of the  
230 defensive symbiont, there is always an increase in average realised virulence (i.e. the average level  
231 of virulence experienced by parasitised hosts, with or without the defensive symbiont; Fig. 2b).  
232 Average realised virulence is markedly lower than the increase in evolved virulence (Fig. 2a-b) due to  
233 the presence of the defensive symbiont, but hosts that do not possess the defensive symbiont will  
234 experience the full increase in virulence. Average realised virulence is minimised at an intermediate  
235 level of host protection, where there are relatively more hosts harbouring both microbes (Fig. 2c),  
236 and at high levels of protection there can be a sharp increase in average realised virulence due to a  
237 combination of strong selection for virulence (Fig. 2a) and fewer hosts possessing the defensive  
238 symbiont (Fig. 2c).

239

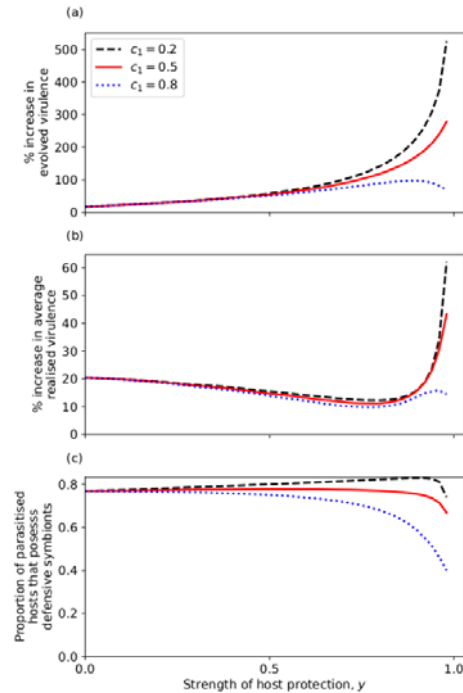

240

241 *Fig. 2: Evolution of parasite virulence following the introduction of the defensive*  
242 *symbiont. (a) Evolved virulence relative to the initial stable level of virulence in the*  
243 *absence of the defensive symbiont. (b) The percentage increase in average realised*  
244 *virulence compared with the absence of the defensive symbiont. (c) The proportion of*  
245 *parasitised hosts that possess defensive symbionts. The black dashed line corresponds*  
246 *to relatively low costs to the defensive symbiont of conferring protection* ,  
247 *the red solid line to moderate costs* and *the blue dotted line to relatively*  
248 *high costs* . *All other parameters are as in Table 1.*

249 ***DEFENSIVE SYMBIONTS CAN DRIVE PARASITE DIVERSIFICATION***

250 In addition to selecting for higher parasite virulence, the defensive symbiont can also drive  
251 diversification when tolerance is maximised or very close to being maximised ( $y \approx 1$ ), causing the  
252 parasite to branch into two subpopulations (Fig. 3). One of these subpopulations has a high level of  
253 virulence (and transmission), and is primarily found in hosts that also harbour the defensive  
254 symbiont, while the other evolves a much lower level of virulence and is primarily found in hosts  
255 that do not harbour the defensive symbiont (Fig. 3bii). Note that when tolerance is maximised at  
256  $y = 1$ , parasite virulence is completely negated in hosts that possess defensive symbionts, but the  
257 two strains are maintained in the population due to their contrasting strategies in isolation and the  
258 frequency with which they co-occur with the defensive symbiont. Evolutionary branching in parasite  
259 virulence occurs when the strength of the cost to the defensive symbiont is within a relatively  
260 narrow range. When the costs of host protection are below this range, there is only runaway  
261 selection for virulence (Fig. 3ai), and when the costs are above this range, there may be runaway  
262 selection for virulence or a stable level of virulence may evolve (Fig. 3aiii).



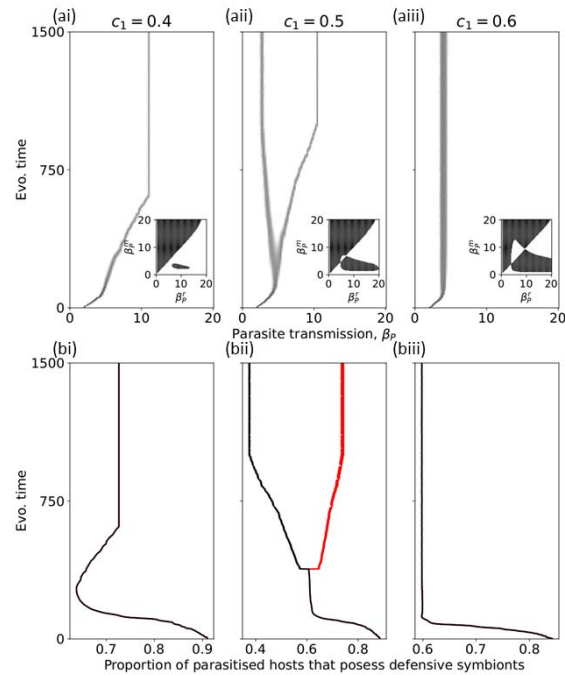

263

264 *Fig. 3: Parasite diversification driven by a defensive symbiont. Row a: evolutionary*  
265 *simulations with inset pairwise invasion plots (black regions showing where the*  
266 *mutant can invade). Row b: the proportion of parasitised hosts which also possess the*  
267 *defensive symbiont. For bii, the red line (right branch) corresponds to the high*  
268 *virulence strain, and the black line (left branch) corresponds to the low virulence*  
269 *strain Costs of host protection: (column i)  $c_1 = 0.4$ , (column ii)  $c_1 = 0.5$  and (column iii)*  
270  *$c_1 = 0.6$ . All other parameters as in Table 1.*

271

272 ***SYMBIONT-PARASITE COEVOLUTION CAN BE DETRIMENTAL TO THE HOST POPULATION***

273 We now allow the level of protection conferred by the defensive symbiont to coevolve with parasite  
274 virulence. The parasite, as before, is initialised to its stable level of virulence (equation 8) in the  
275 absence of the defensive symbiont. We then introduce the defensive symbiont at different initial  
276 levels of protection to determine if coevolution results in (i) increased or decreased conferred  
277 protection and (ii) a net cost or benefit to the host population.

278

279 We first determine the range of possible evolutionary outcomes for the defensive symbiont as the  
280 cost parameters associated with host protection vary (Fig. 4). It is well-established that trade-off  
281 shapes determine qualitative evolutionary outcomes (Hoyle et al. 2008) and the range of outcomes  
282 in our model and when they occur is consistent with previous theory (Ashby and King 2017). Under  
283 decelerating trade-offs ( $c_2 < 0$ ), the defensive symbiont either maximises or minimises host  
284 protection (potentially depending on the initial level of protection; Fig. 4), as a small increase from  
285 no protection ( $y = 0$ ) is relatively costly, whereas changes at higher levels of protection are less  
286 costly. The defensive symbiont therefore either overcomes the initial cost and experiences runaway  
287 selection for maximal protection, or experiences selection against host protection. When the costs  
288 of host protection accelerate ( $c_2 > 0$ ), the defensive symbiont maximises protection if the strength  
289 of the cost is sufficiently low, and evolves to either an intermediate level of protection or no  
290 protection if the strength of the cost is sufficiently high (Fig. 4).

291

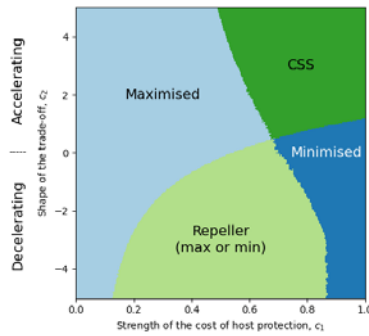

292

293 *Fig. 4: Classification of the coevolutionary outcome for the defensive symbiont as a*  
294 *function of the two cost function parameters; , the strength of cost ranging from 0*  
295 *(no cost) to 1 (maximal cost), and the shape of the trade-off with transmission:*  
296 *accelerating , linear , decelerating . The repeller region results*  
297 *in the defensive symbiont either maximising or minimising host protection depending*  
298 *on the initial level of protection. The CSS region corresponds to a continuously stable*  
299 *strategy at an intermediate level of protection. All other parameters as in Table 1.*

300

301 We now consider how virulence coevolves with host protection to determine the net effect on the  
302 host population following the introduction of the defensive symbiont (Fig. 5). First, we find that  
303 while a defensive symbiont may initially increase the host population size, the host always  
304 eventually suffers a decrease in population size due to parasite-symbiont coevolution, regardless of  
305 the initial strength of protection (indicated by the terminus of each evolutionary trajectory residing  
306 in regions with a negative percentage increase in host population size). This occurs for one or more  
307 of the following three reasons: (1) the symbiont may experience selection against tolerance,  
308 resulting in a reduction or even loss of host protection; (2) the defensive symbiont incurs a small cost  
309 to the host; and (3) while the defensive symbiont may confer tolerance to some hosts, the parasite  
310 subsequently experiences selection for higher virulence, and so hosts without the defensive  
311 symbiont experience higher virulence.

312

313 Although there is always eventually a net-negative effect on the host population size following  
314 parasite-symbiont coevolution, the same is not necessarily true for realised virulence (i.e. the  
315 average disease-associated mortality rate). In many cases an initially positive effect on average  
316 realised virulence is followed by a long-term negative effect (as observed for the host population  
317 size measure above), but when the costs of protection are sufficiently strong and accelerate, there is  
318 a reduction in average realised virulence (Fig. 5b).

319

320 When the costs of protection accelerate, the parasite and symbiont coevolve to co-continuously  
321 stable strategies (Fig. 5a and b), but when the costs of protection decelerate, the outcome may  
322 depend on the initial conditions, with sufficiently low levels of initial protection leading to selection  
323 against any protection and a minor increase in parasite virulence (Fig. 5c and d), and sufficiently high

324 levels of initial protection leading to selection for maximal protection and high virulence (Fig. 5c).  
325 Somewhat paradoxically, this means that the introduction of a highly protective symbiont can lead  
326 to a much larger negative effect on the host population than the introduction of a symbiont that  
327 confers only a low level of protection.

328

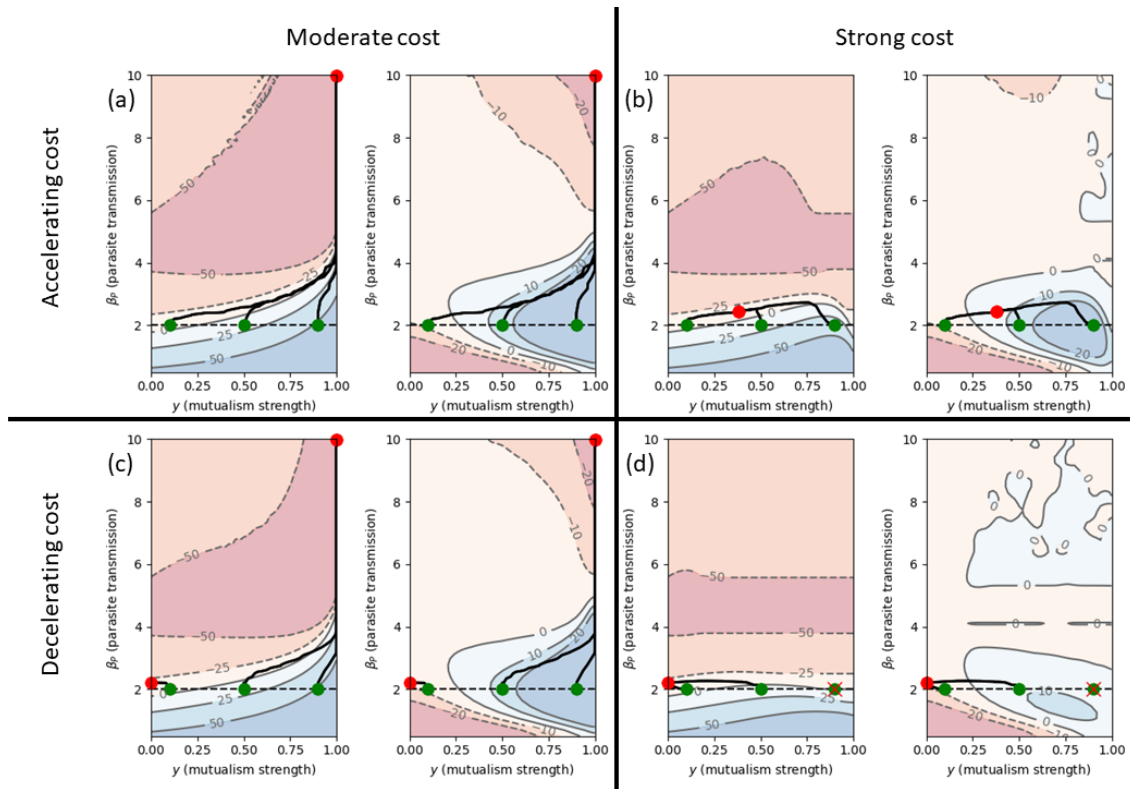

329

330 Fig. 5: Heatmaps for the changes in population size and death rate (as given in  
 331 equations (18)-(19)) for various mutualist cost functions. We show moderate cost  
 332 ( $c_1 = 0.4$ ) in the left column and strong cost ( $c_1 = 0.9$ ) in the right, with accelerating  
 333 cost ( $c_2 = 2$ ) and decelerating cost ( $c_2 = -2$ ) in the top and bottom rows respectively.  
 334 Colours and values on the contour plots denote percentage changes for a given trait  
 335 space pair  $(y, \beta_p)$ . Green dots are the initial value, solid black lines denote an  
 336 evolutionary trajectory in trait space, and the red dots are the ends. The black dashed  
 337 line is the CSS value for the parasite transmission when it is the only microbe in  
 338 circulation.

## 339 **DISCUSSION**

340 Defensive symbionts are found throughout the natural world and are potentially important agents of  
341 biocontrol, yet the robustness of host protection and their eco-evolutionary impacts on parasite  
342 evolution are poorly understood. In this study, we have theoretically explored the (co)evolutionary  
343 dynamics of parasite virulence and host protection by a defensive symbiont in the form of tolerance.  
344 We have investigated the behaviour of both the parasite and the defensive symbiont, as well as the  
345 net effect on the host population. We have shown that the parasite will always evolve to be more  
346 virulent following the introduction of a tolerance-conferring defensive symbiont, and this always has  
347 a negative impact on the host population size even if the defensive symbiont evolves to confer  
348 maximum host protection. Furthermore, our model reveals that the defensive symbiont can cause  
349 diversification in the parasite population for sufficiently high levels of host protection, leading to the  
350 coexistence of low and high virulence phenotypes. Overall, our results suggest that the introduction  
351 of tolerance-conferring defensive symbionts is likely to lead to higher evolved and realised virulence,  
352 resulting in a net negative impact on the host population.

353

354 Higher virulence always evolves because the defensive symbiont confers protection to the host by  
355 ameliorating the disease-associated mortality rate, which increases the average infectious period in  
356 coinfecting hosts. Although more virulent parasites experience a sub-optimal level of virulence in  
357 hosts that do not harbour the defensive symbiont, this is more than offset by having a higher  
358 transmission rate in coinfections. Thus, the prevalence of the defensive symbiont, and hence the  
359 frequency of coinfections, plays a crucial role in determining the strength of selection for increased  
360 virulence. The fact that tolerance-conferring symbionts always select for higher virulence mirrors the  
361 literature on imperfect vaccination. (Gandon et al. 2001) showed theoretically how partially effective  
362 vaccines that prevent or reduce disease (i.e., confer tolerance) but do not prevent transmission  
363 select for higher virulence, a prediction that has since been confirmed for Marek's disease in

364 chickens (Read et al. 2015). Imperfectly vaccinated individuals are analogous to hosts who harbour  
365 the defensive symbiont in our model; in both cases, the host experiences lower virulence while still  
366 being able to transmit the infectious agent, weakening the evolutionary trade-off between  
367 transmission and virulence and shifting the balance of selection towards higher virulence. While we  
368 are not aware of any experimental studies that have explored the evolution of virulence in the  
369 presence of a tolerance-conferring symbiont, the strong parallels with imperfect vaccination suggest  
370 that such symbionts should indeed select for higher parasite virulence.

371

372 Even if evolved virulence is higher in the presence of the defensive symbiont, the realised virulence  
373 experienced by hosts with the symbiont can be lower due to host protection. However, hosts  
374 without the defensive symbiont will experience increased virulence, and so the frequency of  
375 coinfections will determine the variance in the realised level of virulence experienced by parasitised  
376 hosts. While the net effect of the defensive symbiont on the host population size might initially be  
377 positive, we have shown that this is not evolutionary robust, either due to selection for higher  
378 parasite virulence (even if selection also favours higher host protection by the defensive symbiont,  
379 as in Fig. 5a), or due to selection against host protection (Fig. 5c-d). However, if the goal is to reduce  
380 the average virulence experienced by infected hosts rather than to maximise host population size,  
381 then it is possible to achieve modest gains in host survival provided the cost of conferring host  
382 protection accelerates with greater host protection and the overall strength of costs are sufficiently  
383 high (Fig. 5b).

384

385 These results have critical implications for the use of defensive symbionts as biocontrol agents, with  
386 tolerance-conferring symbionts likely to be a poor choice for long-term infectious disease control at  
387 the population level. Moreover, our model demonstrates the need to investigate the possible  
388 evolutionary dynamics of both defensive symbionts and parasites when considering the use of



389 biocontrols, as short-term ecological dynamics may be a poor predictor of long-term outcomes.  
390 Counter-intuitively, our model reveals that under certain trade-offs, the introduction of a more  
391 protective defensive symbiont can lead to far worse outcomes for the host population in the long-  
392 term compared than if a less protective symbiont is introduced (Fig. 5c). This is due to the presence  
393 of an evolutionary repeller, which either leads to the evolution of higher virulence and if the initial  
394 level of protection is sufficiently high, or leads to selection against protection and little change in  
395 virulence if the initial level of protection is low. Due to the complex nature of eco-evolutionary  
396 feedbacks in these systems and the potential for unexpected evolutionary trajectories, we urge  
397 caution in the use of tolerance-conferring symbionts.

398

399 Our final key result is that the defensive symbiont can drive parasite diversification into high and low  
400 virulence phenotypes. This occurs because the defensive symbiont adds an additional feedback on  
401 the parasite population, which allows the different phenotypes to specialise on hosts that either lack  
402 or possess the defensive symbiont. However, we found that the level of tolerance conferred by the  
403 symbiont must be very high for diversification to occur, which suggests that although this is  
404 theoretically possible, it is unlikely to be common in real populations. Nevertheless, the fact that a  
405 defensive symbiont can facilitate parasite diversification emphasises the importance of considering  
406 the effects of additional species interactions on host and parasite diversity, and this finding follows a  
407 general pattern in recent theoretical studies of branching in host-parasite-predator systems (Best  
408 2018; Kisdi, Geritz, and Boldin 2013).

409

410 To date, few studies have experimentally explored the evolution of parasite virulence in the  
411 presence of defensive symbionts (King et al. 2016; Ford et al. 2017; May et al. 2022). (May et al.  
412 2022) have shown that when a plant host (*Zea mays*) is infected by a pathogenic fungus (*Ustilago*  
413 *maydis*), parasite fitness is maximised at higher levels of virulence in the presence of a defensive

414 symbiont (*Fusarium verticillioides*), in agreement with our model. However, (Ford et al. 2016)  
415 experimentally coevolved pathogenic *Staphylococcus aureus* and protective *Enterococcus faecalis* in  
416 *Caenorhabditis elegans* hosts, which led to a reduction in pathogen virulence and generated  
417 fluctuating selection dynamics ((Ford et al. 2017). The contrast with our results is because *E. faecalis*  
418 confers protection through the production of antimicrobial superoxides which directly inhibit *S.*  
419 *aureus* rather than conferring tolerance to the host. The stark contrast in evolutionary outcomes  
420 with our model emphasises the importance of understanding the mechanism of host protection.  
421 Moreover, most studies of defensive symbionts focus on those that confer protection in terms of a  
422 reduced parasite load (e.g., due to interference competition) (Hoang and King 2022), and tolerance-  
423 conferring symbionts are understudied. Indeed, we are aware of only one study that explicitly shows  
424 defensive symbionts conferring tolerance to the host, with *Bacteroides fragilis* conferring tolerance  
425 by inducing the production of anti-inflammatory proteins against an experimental colitis caused by  
426 the bacterium *Heliobacter hepaticus* ((Mazmanian, Round, and Kasper 2008).

427

428 Given that many defensive symbionts confer host protection through other mechanisms (including  
429 through upregulation of host immune responses (Ford, Drew, and King 2022)), the eco-evolutionary  
430 implications of introducing different types of symbionts should be explored in future theoretical  
431 studies. Furthermore, we have implicitly modelled how the defensive symbiont and parasite interact  
432 at the within-host level, along with trade-offs between transmission and tolerance or virulence. This  
433 simplification makes the model much more tractable, but an important direction for future research  
434 is to explicitly model the within-host dynamics and couple these to between-host transmission.  
435 Coupling within- and between-host modelling has been shown to provide new insights than  
436 population-level modelling on its own cannot provide. Modelling at each level explicitly means that  
437 we can investigate conflicting selection, i.e. where the most successful phenotype at one level is not  
438 necessarily the most successful at the other (Frank 1996; van Baalen and Sabelis 1995; Levin and Bull

439 1994). The overall evolutionary outcomes will heavily depend on this conflicting selection that  
440 cannot be fully captured by simply modelling at the between-host level only. Another important  
441 consequence of explicit within-host modelling is providing insights into trade-offs and recovery  
442 rates. Several nested models have shown that any trade-offs depend heavily on the within-host  
443 dynamics (Ganusov, Bergstrom, and Antia 2002; Gilchrist and Sasaki 2002; André, Ferdy, and Godelle  
444 2003; Alizon and van Baalen 2005; Gilchrist and Coombs 2006), whilst recovery rates, which are  
445 traditionally considered to be constant and independent of other parameters, have been shown to  
446 be important for the evolution of virulence (Ganusov and Antia 2006; André and Gandon 2006). In  
447 the context of defensive symbiont-parasite dynamics, explicit within-host modelling will allow for a  
448 greater understanding of how a range of different mechanisms, such as interference competition,  
449 resource competition, spite, priority effects and interactions with the host immune system impact  
450 on the evolution of virulence and host protection.

451

452 Overall, our model reveals how tolerance-conferring defensive symbionts typically have a net  
453 negative impact on the host population over the long-term as they always select for higher parasite  
454 virulence and are therefore poor candidates for biocontrol.

455

## 456 **ACKNOWLEDGEMENTS**

457 BA is funded by Natural Environment Research Council grants NE/N014979/1 and NE/V003909/1.

458 CAS is funded by Natural Environment Research Council grant NE/V003909/1. We acknowledge the

459 support of the Natural Sciences and Engineering Research Council of Canada (NSERC). Nous

460 remercions le Conseil de recherches en sciences naturelles et en génie du Canada (CRSNG) de son

461 soutien.

462

## 463 **COMPETING INTERESTS**

464 The authors declare no competing interests

465

## 466 **DATA ACCESSIBILITY**

467 The Python code for the implementation of this model can be found here:

468 <https://github.com/CameronSmith50/Defensive-Symbiosis>

## 469 **REFERENCES**

- 470 Alizon, Samuel. 2013. 'Co-Infection and Super-Infection Models in Evolutionary Epidemiology'.  
471 *Interface Focus* 3 (6). <https://doi.org/10.1098/rsfs.2013.0031>.
- 472 Alizon, Samuel, and Minus van Baalen. 2005. 'Emergence of a Convex Trade-Off between  
473 Transmission and Virulence'. *The American Naturalist* 165 (6): E155–67.  
474 <https://doi.org/10.1086/430053>.
- 475 André, Jean-Baptiste, Jean-Baptiste Ferdy, and Bernard Godelle. 2003. 'Within-Host Parasite  
476 Dynamics, Emerging Trade-off, and Evolution of Virulence with Immune System'. *Evolution*  
477 57 (7): 1489–97. <https://doi.org/10.1111/j.0014-3820.2003.tb00357.x>.
- 478 André, Jean-Baptiste, and Sylvain Gandon. 2006. 'Vaccination, within-Host Dynamics and Virulence  
479 Evolution'. *Evolution* 60 (1): 13–23. <https://doi.org/10.1111/j.0014-3820.2006.tb01077.x>.
- 480 Arnold, A. Elizabeth, Luis Carlos Mejía, Damond Kylo, Enith I. Rojas, Zuleyka Maynard, Nancy  
481 Robbins, and Edward Allen Herre. 2003. 'Fungal Endophytes Limit Pathogen Damage in a  
482 Tropical Tree'. *Proceedings of the National Academy of Sciences of the United States of*  
483 *America* 100 (26): 15649–54. <https://doi.org/10.1073/pnas.2533483100>.
- 484 Ashby, Ben, and Kayla C. King. 2017. 'Friendly Foes: The Evolution of Host Protection by a Parasite'.  
485 *Evolution Letters* 1 (4): 211–21. <https://doi.org/10.1002/evl3.19>.
- 486 Baalen, Minus van, and Maurice W. Sabelis. 1995. 'The Dynamics of Multiple Infection and the  
487 Evolution of Virulence'. *The American Naturalist* 146 (6): 881–910.  
488 <https://doi.org/10.1086/285830>.
- 489 Bakken, Johan S., Thomas Borody, Lawrence J. Brandt, Joel V. Brill, Daniel C. Demarco, Marc Alaric  
490 Franzos, Colleen Kelly, et al. 2011. 'Treating Clostridium Difficile Infection With Fecal  
491 Microbiota Transplantation'. *Clinical Gastroenterology and Hepatology* 9 (12): 1044–49.  
492 <https://doi.org/10.1016/j.cgh.2011.08.014>.
- 493 Belt, Thomas. 1874. *The Naturalist in Nicaragua*. University Press of the Pacific.
- 494 Best, Alex. 2018. 'Host–Pathogen Coevolution in the Presence of Predators: Fluctuating Selection  
495 and Ecological Feedbacks'. *Proceedings of the Royal Society B: Biological Sciences* 285 (1885):  
496 20180928. <https://doi.org/10.1098/rspb.2018.0928>.
- 497 Cariveau, Daniel P., J. Elijah Powell, Hauke Koch, Rachael Winfree, and Nancy A. Moran. 2014.  
498 'Variation in Gut Microbial Communities and Its Association with Pathogen Infection in Wild  
499 Bumble Bees (*Bombus*)'. *The ISME Journal* 8 (12): 2369–79.  
500 <https://doi.org/10.1038/ismej.2014.68>.
- 501 Chamberlain, Scott A., Judith L. Bronstein, and Jennifer A. Rudgers. 2014. 'How Context Dependent  
502 Are Species Interactions?' Edited by Rampal Etienne. *Ecology Letters* 17 (7): 881–90.  
503 <https://doi.org/10.1111/ele.12279>.

- 504 Diekmann, O., J. A. P. Heesterbeek, and M. G. Roberts. 2010. 'The Construction of Next-Generation  
505 Matrices for Compartmental Epidemic Models'. *Journal of The Royal Society Interface* 7 (47).  
506 <https://doi.org/10.1098/rsif.2009.0386>.
- 507 Ford, Suzanne A., Georgia C. Drew, and Kayla C. King. 2022. 'Immune-Mediated Competition Benefits  
508 Protective Microbes over Pathogens in a Novel Host Species'. *Heredity*, November.  
509 <https://doi.org/10.1038/s41437-022-00569-3>.
- 510 Ford, Suzanne A., Damian Kao, David Williams, and Kayla C. King. 2016. 'Microbe-Mediated Host  
511 Defence Drives the Evolution of Reduced Pathogen Virulence'. *Nature Communications* 7 (1):  
512 13430. <https://doi.org/10.1038/ncomms13430>.
- 513 Ford, Suzanne A., and Kayla C. King. 2016. 'Harnessing the Power of Defensive Microbes:  
514 Evolutionary Implications in Nature and Disease Control'. Edited by Carolyn B Coyne. *PLOS*  
515 *Pathogens* 12 (4): e1005465. <https://doi.org/10.1371/journal.ppat.1005465>.
- 516 Ford, Suzanne A., David Williams, Steve Paterson, and Kayla C. King. 2017. 'Co-Evolutionary  
517 Dynamics between a Defensive Microbe and a Pathogen Driven by Fluctuating Selection'.  
518 *Molecular Ecology* 26 (7): 1778–89. <https://doi.org/10.1111/mec.13906>.
- 519 Frank, Steven A. 1996. 'Models of Parasite Virulence'. *The Quarterly Review of Biology* 71 (1): 37–78.  
520 <https://doi.org/10.1086/419267>.
- 521 Gandon, Sylvain, Margaret J. Mackinnon, Sean Nee, and Andrew F. Read. 2001. 'Imperfect Vaccines  
522 and the Evolution of Pathogen Virulence'. *Nature* 414 (6865): 751–56.  
523 <https://doi.org/10.1038/414751a>.
- 524 Ganusov, Vitaly V., and Rustom Antia. 2006. 'Imperfect Vaccines and the Evolution of Pathogens  
525 Causing Acute Infections in Vertebrates'. *Evolution* 60 (5): 957–69.  
526 <https://doi.org/10.1111/j.0014-3820.2006.tb01174.x>.
- 527 Ganusov, Vitaly V., Carl T. Bergstrom, and Rustom Antia. 2002. 'Within-Host Population Dynamics  
528 and the Evolution of Microparasites in a Heterogeneous Host Population'. *Evolution* 56 (2):  
529 213–23. <https://doi.org/10.1111/j.0014-3820.2002.tb01332.x>.
- 530 Gilchrist, Michael A., and Daniel Coombs. 2006. 'Evolution of Virulence: Interdependence,  
531 Constraints, and Selection Using Nested Models'. *Theoretical Population Biology* 69 (2).  
532 <https://doi.org/10.1016/j.tpb.2005.07.002>.
- 533 Gilchrist, Michael A, and Akira Sasaki. 2002. 'Modeling Host-Parasite Coevolution: A Nested  
534 Approach Based on Mechanistic Models'. *J. Theor. Biol* 218: 289–308.  
535 <https://doi.org/10.1006/jtbi.3076>.
- 536 Gil-Turnes, M. S., and W. Fenical. 1992. 'Embryos of *Homarus Americanus* Are Protected by Epibiotic  
537 Bacteria'. *The Biological Bulletin* 182 (1): 105–8. <https://doi.org/10.2307/1542184>.
- 538 Gil-Turnes, M. S., M. E. Hay, and W. Fenical. 1989. 'Symbiotic Marine Bacteria Chemically Defend  
539 Crustacean Embryos from a Pathogenic Fungus'. *Science (New York, N.Y.)* 246 (4926): 116–  
540 18. <https://doi.org/10.1126/science.2781297>.
- 541 González, Rubén, Anamarija Butković, Francisco J. Escaray, Javier Martínez-Latorre, Ízan Melero,  
542 Enric Pérez-Parets, Aurelio Gómez-Cadenas, Pedro Carrasco, and Santiago F. Elena. 2021.  
543 'Plant Virus Evolution under Strong Drought Conditions Results in a Transition from  
544 Parasitism to Mutualism'. *Proceedings of the National Academy of Sciences* 118 (6):  
545 e2020990118. <https://doi.org/10.1073/pnas.2020990118>.
- 546 Hancock, Penelope A., Steven P. Sinkins, and H. Charles J. Godfray. 2011. 'Strategies for Introducing  
547 Wolbachia to Reduce Transmission of Mosquito-Borne Diseases'. Edited by Scott Leslie  
548 O'Neill. *PLoS Neglected Tropical Diseases* 5 (4): e1024.  
549 <https://doi.org/10.1371/journal.pntd.0001024>.
- 550 Heikkilä, M. P., and P. E. J. Saris. 2003. 'Inhibition of Staphylococcus Aureus by the Commensal  
551 Bacteria of Human Milk'. *Journal of Applied Microbiology* 95 (3): 471–78.  
552 <https://doi.org/10.1046/j.1365-2672.2003.02002.x>.
- 553 Herre, Edward Allen, Luis C. Mejía, Damond A. Kyllö, Enith Rojas, Zuleyka Maynard, Andre Butler,  
554 and Sunshine A. Van Bael. 2007. 'Ecological Implications of Anti-Pathogen Effects of Tropical

- 555 Fungal Endophytes and Mycorrhizae'. *Ecology* 88 (3): 550–58. [https://doi.org/10.1890/05-](https://doi.org/10.1890/05-1606)  
556 1606.
- 557 Hoang, Kim L., and Kayla C. King. 2022. 'Symbiont-Mediated Immune Priming in Animals through an  
558 Evolutionary Lens'. *Microbiology* 168 (4). <https://doi.org/10.1099/mic.0.001181>.
- 559 Hoyle, Andrew, Roger G. Bowers, Andrew White, and Michael Boots. 2008. 'The Influence of Trade-  
560 off Shape on Evolutionary Behaviour in Classical Ecological Scenarios'. *Journal of Theoretical*  
561 *Biology* 250 (3): 498–511. <https://doi.org/10.1016/j.jtbi.2007.10.009>.
- 562 King, Kayla C, Michael A Brockhurst, Olga Vasieva, Steve Paterson, Alex Betts, Suzanne A Ford,  
563 Crystal L Frost, Malcolm J Horsburgh, Sam Haldenby, and Gregory DD Hurst. 2016. 'Rapid  
564 Evolution of Microbe-Mediated Protection against Pathogens in a Worm Host'. *The ISME*  
565 *Journal* 10 (8): 1915–24. <https://doi.org/10.1038/ismej.2015.259>.
- 566 Kisdi, Eva, Stefan A.H. Geritz, and Barbara Boldin. 2013. 'Evolution of Pathogen Virulence under  
567 Selective Predation: A Construction Method to Find Eco-Evolutionary Cycles'. *Journal of*  
568 *Theoretical Biology* 339 (December): 140–50. <https://doi.org/10.1016/j.jtbi.2013.05.023>.
- 569 Lauer, Antje, and Trang Hernandez. 2015. 'Cutaneous Bacterial Species from *Lithobates*  
570 *Catesbeianus* Can Inhibit Pathogenic Dermatophytes'. *Mycopathologia* 179 (3–4): 259–68.  
571 <https://doi.org/10.1007/s11046-014-9838-1>.
- 572 Leimer, Olaf. 2009. 'Multidimensional Convergence Stability'. *Evolutionary Ecology Research*.  
573 <http://zootis.zoologi.su.se/research/leimar/fulltext/Leimar2009b.pdf>.
- 574 Levin, Bruce R., and James J. Bull. 1994. 'Short-Sighted Evolution and the Virulence of Pathogenic  
575 Microorganisms'. *Trends in Microbiology* 2 (3): 76–81. [https://doi.org/10.1016/0966-](https://doi.org/10.1016/0966-842X(94)90538-X)  
576 842X(94)90538-X.
- 577 Lin, Derek, and Britt Koskella. 2015. 'Friend and Foe: Factors Influencing the Movement of the  
578 Bacterium *Helicobacter Pylori* along the Parasitism-Mutualism Continuum'. *Evolutionary*  
579 *Applications* 8 (1): 9–22. <https://doi.org/10.1111/eva.12231>.
- 580 May, Georgiana, Ruth G. Shaw, Charles J. Geyer, and Daniel J. Eck. 2022. 'Do Interactions among  
581 Microbial Symbionts Cause Selection for Greater Pathogen Virulence?' *The American*  
582 *Naturalist* 199 (2): 252–65. <https://doi.org/10.1086/717679>.
- 583 Mazmanian, Sarkis K., June L. Round, and Dennis L. Kasper. 2008. 'A Microbial Symbiosis Factor  
584 Prevents Intestinal Inflammatory Disease'. *Nature* 453 (7195): 620–25.  
585 <https://doi.org/10.1038/nature07008>.
- 586 Moreira, Luciano A., Iñaki Iturbe-Ormaetxe, Jason A. Jeffery, Guangjin Lu, Alyssa T. Pyke, Lauren M.  
587 Hedges, Bruno C. Rocha, et al. 2009. 'A *Wolbachia* Symbiont in *Aedes Aegypti* Limits  
588 Infection with Dengue, Chikungunya, and Plasmodium'. *Cell* 139 (7): 1268–78.  
589 <https://doi.org/10.1016/j.cell.2009.11.042>.
- 590 Nelson, Paul G., and Georgiana May. 2017. 'Coevolution between Mutualists and Parasites in  
591 Symbiotic Communities May Lead to the Evolution of Lower Virulence'. *The American*  
592 *Naturalist* 190 (6): 803–17. <https://doi.org/10.1086/694334>.
- 593 Nelson, Paul, and Georgiana May. 2020. 'Defensive Symbiosis and the Evolution of Virulence'. *The*  
594 *American Naturalist* 196 (3): 333–43. <https://doi.org/10.1086/709962>.
- 595 Oliver, Kerry M., Jacob A. Russell, Nancy A. Moran, and Martha S. Hunter. 2003. 'Facultative Bacterial  
596 Symbionts in Aphids Confer Resistance to Parasitic Wasps'. *Proceedings of the National*  
597 *Academy of Sciences of the United States of America* 100 (4): 1803–7.  
598 <https://doi.org/10.1073/pnas.0335320100>.
- 599 Palmer, Todd M., Maureen L. Stanton, Truman P. Young, Jacob R. Goheen, Robert M. Pringle, and  
600 Richard Karban. 2008. 'Breakdown of an Ant-Plant Mutualism Follows the Loss of Large  
601 Herbivores from an African Savanna'. *Science* 319 (5860): 192–95.  
602 <https://doi.org/10.1126/science.1151579>.
- 603 Rafaluk-Mohr, Charlotte, Ben Ashby, Dylan A. Dahan, and Kayla C. King. 2018. 'Mutual Fitness  
604 Benefits Arise during Coevolution in a Nematode-Defensive Microbe Model'. *Evolution*  
605 *Letters* 2 (3): 246–56. <https://doi.org/10.1002/evl3.58>.

- 606 Rafaluk-Mohr, Charlotte, Michael Gerth, Jordan E. Sealey, Alice K.E. Ekroth, Aziz A. Aboobaker, Anke  
607 Klock, and Kayla C. King. 2022. 'Microbial Protection Favors Parasite Tolerance and Alters  
608 Host-Parasite Coevolutionary Dynamics'. *Current Biology* 32 (7): 1593-1598.e3.  
609 <https://doi.org/10.1016/j.cub.2022.01.063>.
- 610 Read, Andrew F., Susan J. Baigent, Claire Powers, Lydia B. Kgosana, Luke Blackwell, Lorraine P. Smith,  
611 David A. Kennedy, Stephen W. Walkden-Brown, and Venugopal K. Nair. 2015. 'Imperfect  
612 Vaccination Can Enhance the Transmission of Highly Virulent Pathogens'. Edited by  
613 Christophe Fraser. *PLOS Biology* 13 (7): e1002198.  
614 <https://doi.org/10.1371/journal.pbio.1002198>.
- 615 Rogalski, Mary A., Tara Stewart Merrill, Camden D. Gowler, Carla E. Cáceres, and Meghan A. Duffy.  
616 2021. 'Context-Dependent Host-Symbiont Interactions: Shifts along the Parasitism-  
617 Mutualism Continuum'. *The American Naturalist* 198 (5): 563–75.  
618 <https://doi.org/10.1086/716635>.
- 619 Selva, Laura, David Viana, Gili Regev-Yochay, Krzysztof Trzcinski, Juan Manuel Corpa, Íñigo Lasa,  
620 Richard P. Novick, and José R. Penadés. 2009. 'Killing Niche Competitors by Remote-Control  
621 Bacteriophage Induction'. *Proceedings of the National Academy of Sciences* 106 (4): 1234–  
622 38. <https://doi.org/10.1073/pnas.0809600106>.
- 623 Troha, Katia, and Janelle S Ayres. 2022. 'Cooperative Defenses during Enteropathogenic Infection'.  
624 *Current Opinion in Microbiology* 65 (February): 123–30.  
625 <https://doi.org/10.1016/j.mib.2021.11.003>.
- 626 Utarini, Adi, Citra Indriani, Riris A. Ahmad, Warsito Tantowijoyo, Eggi Arguni, M. Ridwan Ansari,  
627 Endah Supriyati, et al. 2021. 'Efficacy of Wolbachia-Infected Mosquito Deployments for the  
628 Control of Dengue'. *New England Journal of Medicine* 384 (23): 2177–86.  
629 <https://doi.org/10.1056/NEJMoa2030243>.
- 630
